# Supplementary material for: Genetic manipulation of longevity-related genes as a tool to regulate yeast life span and metabolite production during winemaking
Source: PubMed Central journal article supplement (PMC3583744; doi:10.1186/1475-2859-12-1), 2013-01-02

Figure S1

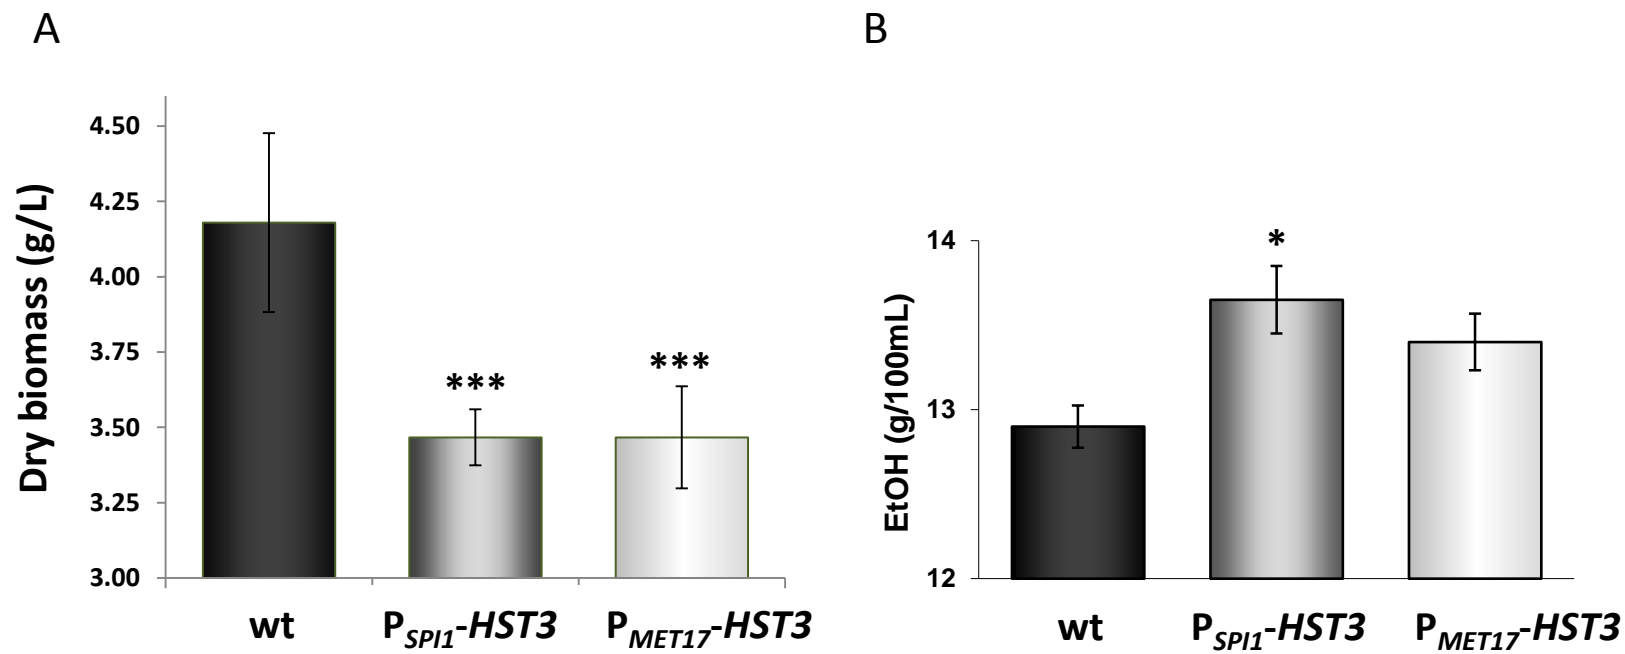

Supplement: 1475-2859-12-1-S1.pdf [file 1475-2859-12-1-S1.pdf]
