# Supplementary material for: Genetic manipulation of longevity-related genes as a tool to regulate yeast life span and metabolite production during winemaking
Source: PubMed Central journal article supplement (PMC3583744; doi:10.1186/1475-2859-12-1), 2013-01-02
Supplement: 1475-2859-12-1-S3.pdf [file 1475-2859-12-1-S3.pdf]

**Table S1. Yeast strains used in this work**

| Strain                         | Genotype                                                | Origin    |
|--------------------------------|---------------------------------------------------------|-----------|
| L2056                          | Winestrain                                              | Lallemand |
| L2056 P <sub>SPI1</sub> -SIR2  | L2056 P <sub>SPI1</sub> -SIR2-kanMX                     | This work |
| L2056 P <sub>MET17</sub> -SIR2 | L2056 P <sub>MET17</sub> -SIR2-kanMX                    | “ “       |
| L2056 P <sub>SPI1</sub> -HST3  | L2056 P <sub>SPI1</sub> -HST3-kanMX                     | “ “       |
| L2056 P <sub>MET17</sub> -HST3 | L2056 P <sub>MET17</sub> -HST3-kanMX                    | “ “       |
| L2056 P <sub>MET17</sub> -GCN5 | L2056 P <sub>MET17</sub> -GCN5-kanMX                    | “ “       |
| C9                             | Mat a <i>ho::loxP</i>                                   | JM Walker |
| C9 <i>puf3</i>                 | C9 <i>puf3::kanMX</i>                                   | This work |
| C9 <i>pub1</i>                 | C9 <i>pub1::kanMX</i>                                   | “         |
| C9 <i>uth4</i>                 | C9 <i>uth4::kanMX</i>                                   | “         |
| C9 <i>aif1</i>                 | C9 <i>aif1::kanMX</i>                                   | “         |
| C9 <i>yca1</i>                 | C9 <i>yca1::kanMX</i>                                   | “         |
| C9 <i>aif1 yca1</i>            | C9 <i>yca1::kanMX aif1::loxP</i>                        | “         |
| EC1118                         | Wine strain                                             | Lallemand |
| EC1118 <i>pub1</i>             | EC1118 <i>pub1::loxP pub1::kanMX</i>                    | This work |
| EC1118 PAB1-GFP                | EC1118 PAB1-GFP::kanMX                                  | This work |
| EC1118 <i>pub1</i><br>PAB1-GFP | EC1118 <i>pub1::loxP pub1::kanMX</i><br>PAB1-GFP::kanMX | This work |
